# Supplementary material for: Aristolochic acid exposure in Romania and implications for renal cell carcinoma
Source: PubMed Central journal article supplement — Br J Cancer. 2015 Dec 10;114(1):76–80. doi: 10.1038/bjc.2015.402 (PMC4716534; doi:10.1038/bjc.2015.402), 2015-12-10
Supplement: bjc2015402x1.pdf [file bjc2015402x1.pdf]

## Supplementary figures.

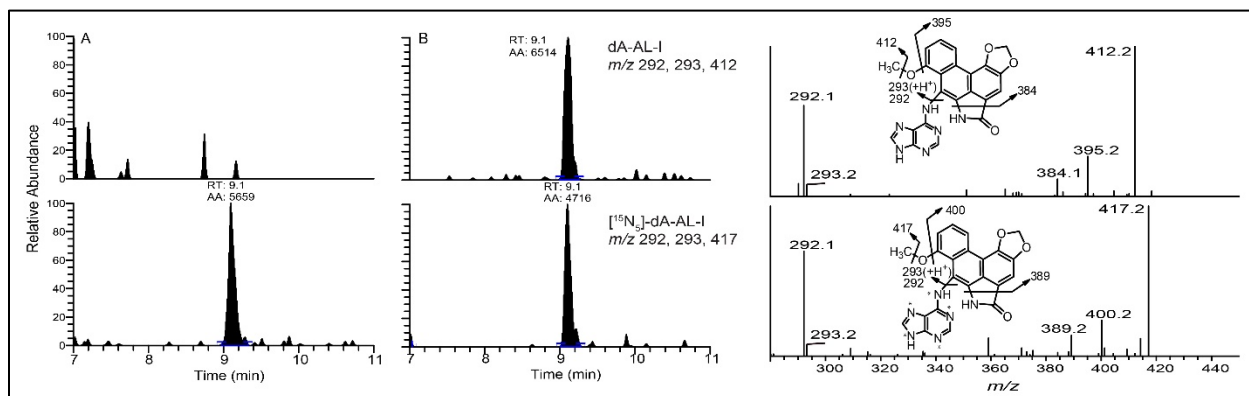

**Supplementary Figure 1. Examples of UPLC-ESI/MS<sup>3</sup> reconstructed ion chromatograms of dA-AL-I from human kidney cortex of patients with RCC. (A) Case from Czech with no detectable dA-AL-I; (B) Case from Romania positive for dA-AL-I. The product ion spectra at the MS<sup>3</sup> scan stage are shown for dA-AL-I and [<sup>15</sup>N<sub>5</sub>]-dA-AL-I. Asterisks (\*) next to nitrogen atoms on adenine based indicate the <sup>15</sup>N isotope label. RT and AA on the mass chromatogram represent retention time and integrated area under peak respectively.**

## Supplementary notes.

### R script for the binomial regression analysis

```
library(xlsx)
##Loading required package: rJava
##Loading required package: xlsxjars

##Import data
d <- read.xlsx('.../supplementary_table>.xlsx',
              sheetIndex=1,
              startRow=3,
              colClasses=c('character')
              )
#Remove footnote and reformat variables
d <- d[-nrow(d), ]
d[,1] <- as.character(d[, 1])
d[,2] <- as.character(d[, 2])
d[,3] <- as.character(d[, 3])
d[, 'tumor_n.A.T.T.A.'] <- as.numeric(as.character(d[, 'tumor_n.A.T.T.A.']))
d[, 'tumor_proportion.A.T.T.A.'] <- as.numeric(as.character(d[, 'tumor_proportion.A.T.T.A.']))

##Change levels below detection to 0
d[which(d[,2] == "<0.3"), 2] <- "0"
d[,2] <- as.numeric(d[,2])

##Create a short name for the adduct-load column
n <- names(d)
n[2] <- 'dA.AL.I'
names(d) <- n
rm(n)

##Select the phenol-chloroform extracted samples for Romanian samples
d <- d[-which((d[,4] == "Romania") & (d[,3] != "Phenol/Chloroform")), ]
rownames(d) <- d[,1]

##Log of number of adducts
d$log1p(dA.AL.I) <- log1p(d$dA.AL.I)

##Fit binomial model on proportion, weighted by number of mutations overall
##(weights scaled to sum to the number of observations)
binreg <- glm(tumor_proportion.A.T.T.A. ~ log1p(dA.AL.I),
              weights=nrow(d)*tumor_n.all_mutations./sum(tumor_n.all_mutations.),
              family=binomial("logit"),
              data=d, model=TRUE)
summary(binreg)
```
